# Supplementary material for: Inhibition of Hepatitis B Virus by AAV8-Derived CRISPR/SaCas9 Expressed From Liver-Specific Promoters
Source: Frontiers journal article supplement (doi:10.3389/fmicb.2021.665184), 2021-06-26
Supplement: Table_1.docx [file Table_1.docx]

|  | **Forward 5’-3’** |
| --- | --- |
| Luc-F | CGGATTACCAGGGATTTCA |
| Luc-R | TCTCACGCAGGCAGTTCTA |
| eGFP-F | TGATGCCGTTCTTCTGCTTGTC |
| eGFP-R | CAGTGCTTCAGCCGCTACCC |
| SaCas9-F | GCAACAAACTGAACGCCCAT |
| SaCas9-R | TCACGAACTTGTACACGCCA |
| GAPDHh-F | ATGACATCAAGAAGGTGGTG |
| GAPDHh-R | CATACCAGGAAATGAGCTTG |
| GAPDHm-F | CCGTGTTCCTACCCCCAAT |
| GAPDHm-R | CTTCACCACCTTCTTGATGTCATC |
| HBVRC/CCS | CTCGTGGTGGACTTCTCTC |
| HBVRC/CCAS | CTGCAGGATGAAGAGGAA |
